# Supplementary material for: Effect of Pt and Ru-based catalysts on the electrochemical hydrodeoxygenation of phenol to cyclohexane
Source: Royal Society of Chemistry journal article supplement (doi:10.1039/d4cy00634h), 2024-01-01
Supplement: d4cy00634h1.pdf [file d4cy00634h1.pdf]

# Effect of Pt and Ru-based catalysts on the electrochemical hydrodeoxygenation of phenol to cyclohexane

Jeffrey R. Page<sup>1,2</sup>, Amol Pophali<sup>3</sup>, Taejin Kim<sup>3</sup>, Juan Ruiz-Lopez<sup>4,5</sup>, Stoyan Bliznakov<sup>1,2</sup>,  
Julia A. Valla<sup>1,2\*</sup>

<sup>1</sup>Department of Chemical and Biomolecular Engineering. University of Connecticut, 191 Auditorium Rd, Unit 3222, Storrs, CT 06269, USA.

<sup>2</sup>Center for Clean Energy Engineering. University of Connecticut, 44 Weaver Rd, Unit 5233, Storrs, CT 06269, USA.

<sup>3</sup>Department of Materials Science and Chemical Engineering. Stony Brook University, Stony Brook, NY 11794, USA.

<sup>4</sup>Pacific Northwest National Laboratory, Institute for Integrated Catalysis, Energy and Environment Directorate, 902 Battelle Blvd., Richland, WA 99352, USA

<sup>5</sup>WSU-PNNL Bioproducts Institute

\* Author to whom correspondence should be addressed, [ioulia.valla@uconn.edu](mailto:ioulia.valla@uconn.edu)

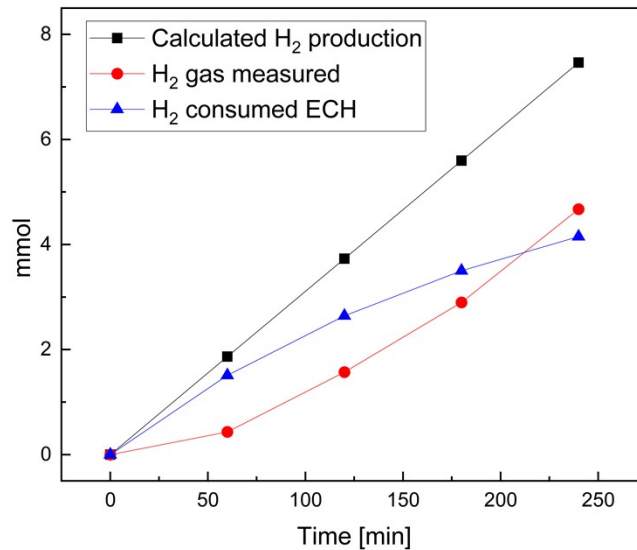

**Figure S1.** Hydrogen balance of phenol EC-HDO experiments using labPtRu-C at constant current  $55 \text{ mA cm}^{-2}$  electrolysis. Hydrogen was measured using an online mass spectrometer. Hydrogen consumed was calculated using the amount of hydrogen required to produce cyclohexane, cyclohexanol and cyclohexanone.

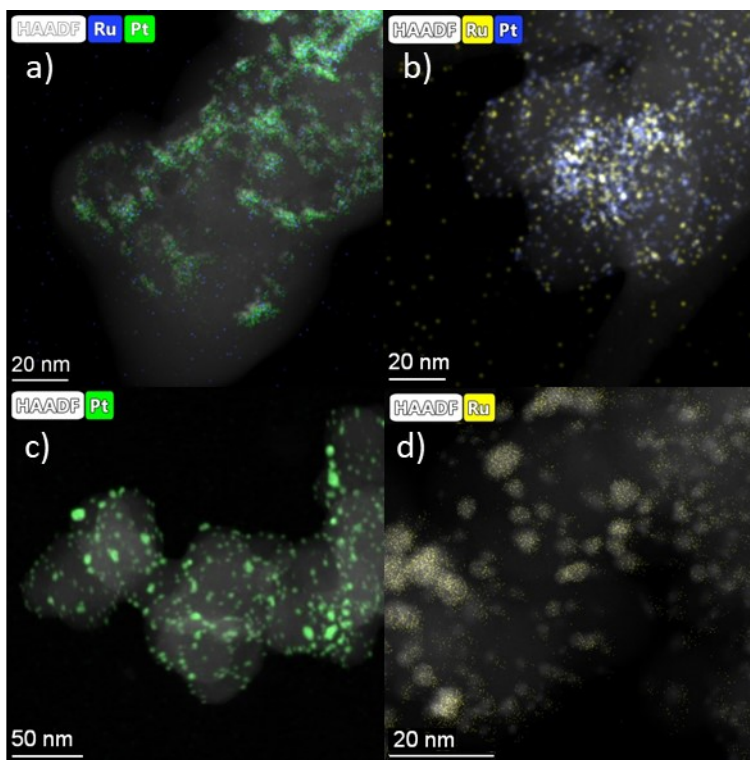

**Figure S2.** HAADF EDS mapping of Pt and Ru for a) comPtRu-C, b) labPtRu-C, c) Pt-C, and d) Ru-C catalysts and e) Ru-C at higher magnification.

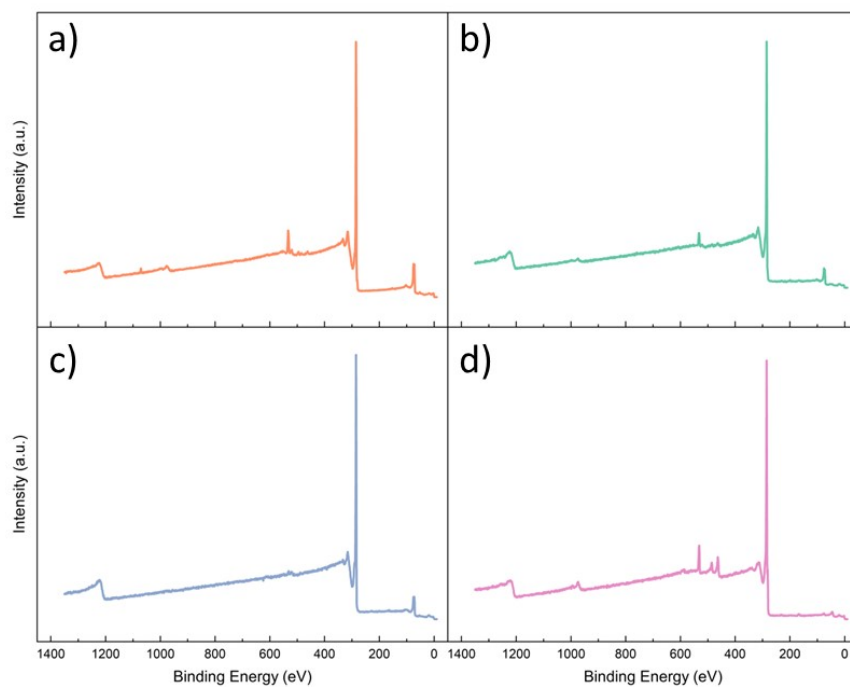

**Figure S3.** XPS binding energy surveys from 1350 eV to 0 eV of a) comPtRu-C, b) labPtRu-C, c) Pt-C, and d) Ru-C catalysts.

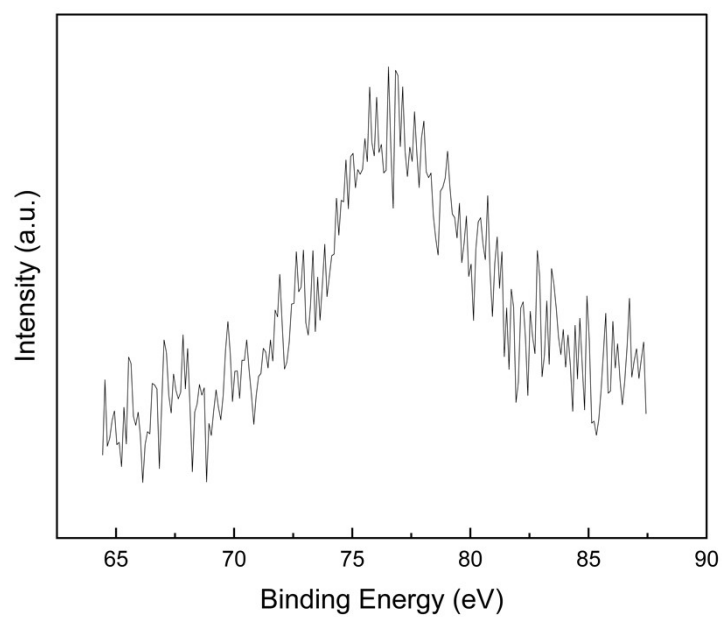

**Figure S4.** XPS Pt 4f scan from 64 eV to 87 eV for the Ru-C catalyst. Ru 4s signal at 75.0 eV for Ru(0) and 75.7 eV for Ru oxide

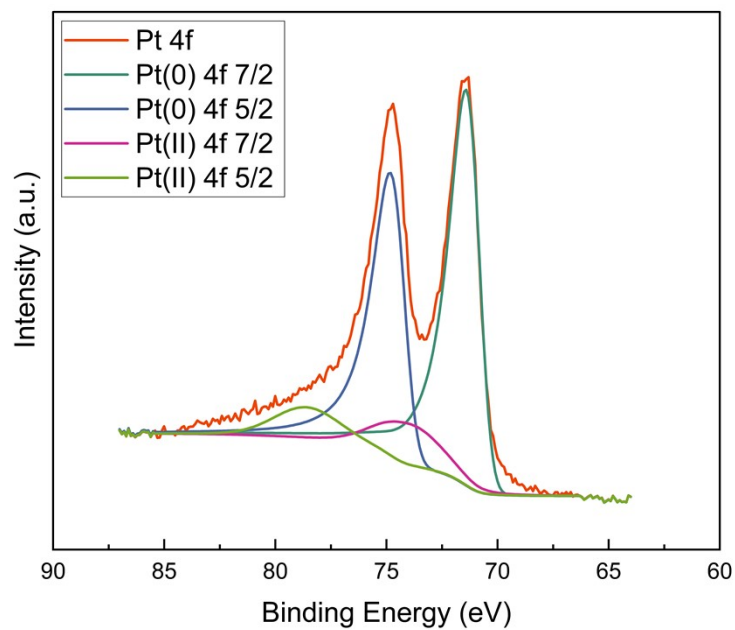

**Figure S5.** XPS Pt 4f scan from 64 eV to 87 eV and peak fitting for the monometallic Pt-C.

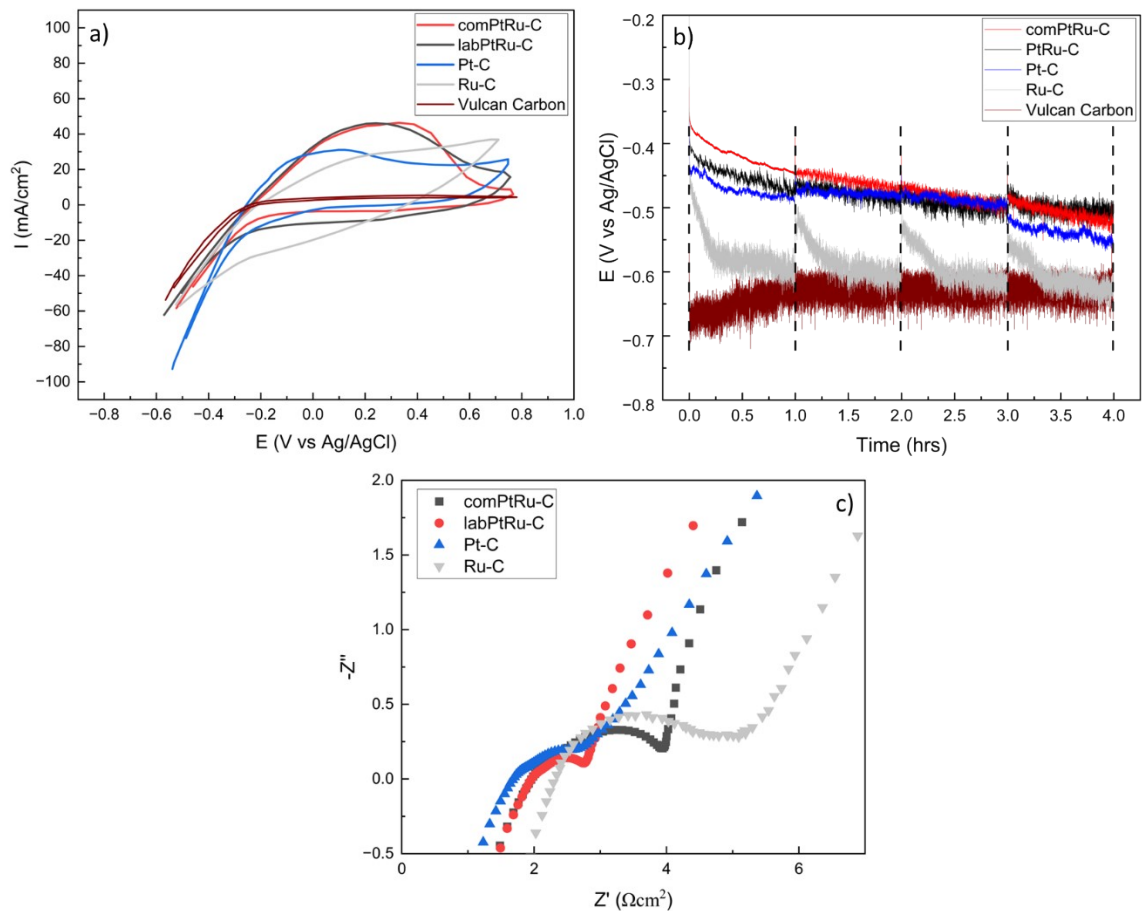

**Figure S6.** a) cyclic voltammogram and b) cathodic potential vs time for the comPtRu-C, labPtRu-C, Pt-C, Ru-C and Vulcan Carbon experiments. Dashed black line represents time point when samples were taken from the catholyte and solvent trap. c) Representative Nyquist plots collected at -0.2 V vs Ag/AgCl for the comPtRu-C, labPtRu-C, Pt-C, and Ru-C experiments.

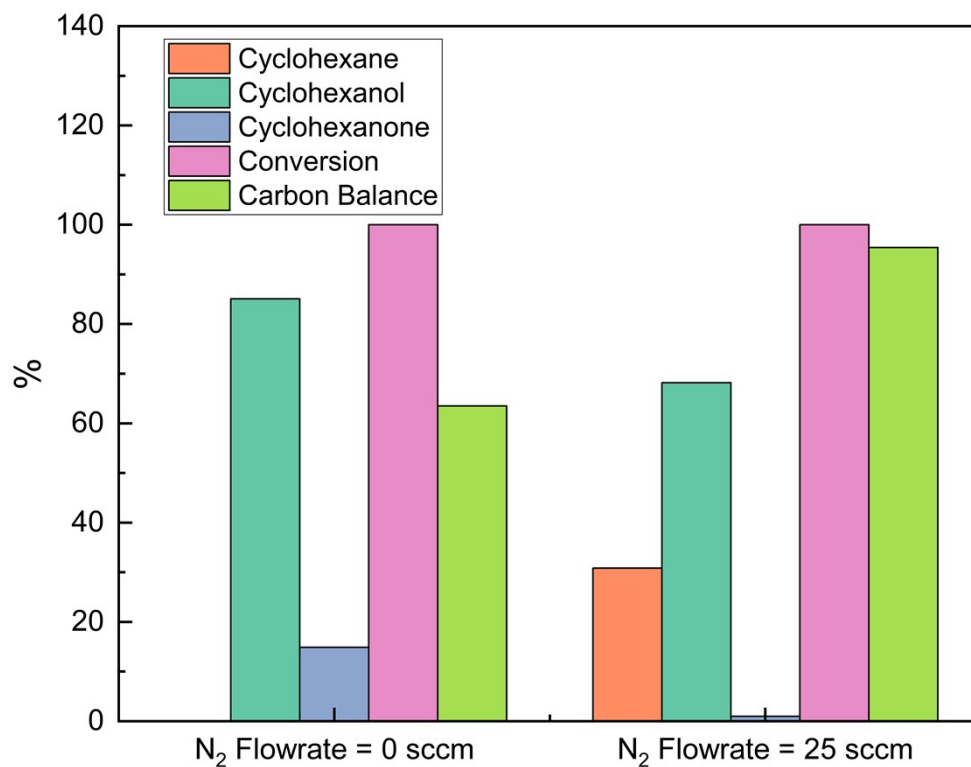

**Figure S7.** Cyclohexane, cyclohexanol, cyclohexanone selectivity, phenol conversion and carbon balance for an EC-HDO experiment of phenol performed in the absence of nitrogen gas flow and with 25 sccm of nitrogen flow through the system. Reaction conditions: N<sub>2</sub> flowrate = 0 mL min<sup>-1</sup> and 25 mL min<sup>-1</sup>, labPtRu-C catalyst, 60 °C, constant current 55 mA cm<sup>-2</sup>, initial phenol concentration 30 mM, electrolyte 0.2 M perchloric acid.

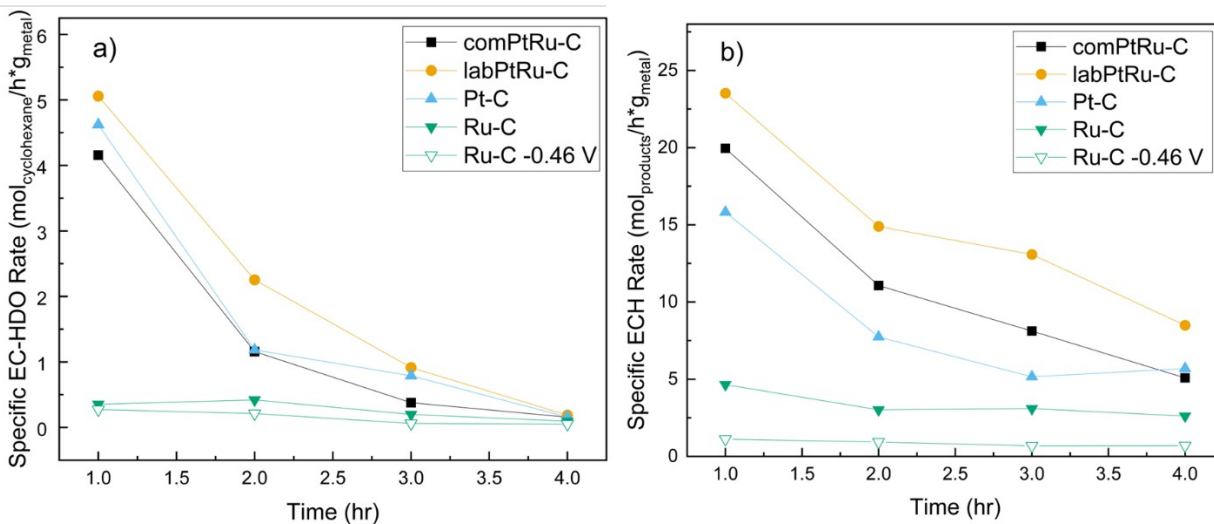

**Figure S8.** a) specific EC-HDO rate and b) specific ECH rate during phenol electrolysis as a function of time for the comPtRu-C, labPtRu-C, Pt-C, and Ru-C catalysts. (Reaction conditions: 50 mL min<sup>-1</sup> N<sub>2</sub>, 60 °C, 0.2 M perchloric acid, 0.2 mg cm<sup>-2</sup>, constant current 55 mA/cm<sup>2</sup>)

**Table 1.** Conversion (X), Selectivity (S) where A = cyclohexane B = cyclohexanol C = cyclohexanone, specific ECH rate (at t = 1 hour), Faradaic efficiency (FE), carbon balance (CB) and average cathodic potential (E) bimetallic lab synthesized PtRu at varying ruthenium to Pt ratios. (Reaction conditions: 50 mL min<sup>-1</sup> N<sub>2</sub>, 60 °C, 0.2 M perchloric acid, 0.2 mg cm<sup>-2</sup>, constant current 55 mA/cm<sup>2</sup>) <sup>+</sup>Reported potentials were iR correct post-experiment.

| Ru Content (%) | X (%) | S <sub>A</sub> (%) | S <sub>B</sub> (%) | S <sub>C</sub> (%) | Specific ECH rate (mol hr <sup>-1</sup> g <sup>-1</sup> <sub>metal</sub> ) | FE (%) | CB (%) | E (V vs Ag/AgCl) <sup>+</sup> |
|----------------|-------|--------------------|--------------------|--------------------|----------------------------------------------------------------------------|--------|--------|-------------------------------|
| 0              | 84.5  | 24.9               | 60.8               | 14.3               | 15.84                                                                      | 32.6   | 87.0   | -0.47                         |
| 8              | 77.7  | 27.2               | 65.0               | 7.8                | 15.7                                                                       | 23.3   | 82.0   | -0.52                         |
| 16             | 100.0 | 30.8               | 68.2               | 1.0                | 23.52                                                                      | 34.9   | 95.4   | -0.47                         |
| 33             | 80.7  | 22.2               | 72.8               | 9.7                | 14.83                                                                      | 27.5   | 90.4   | -0.48                         |
| 50             | 46.9  | 22.8               | 69.6               | 10.5               | 11.04                                                                      | 15.3   | 93.1   | -0.48                         |
| 100            | 41.9  | 10.5               | 84.2               | 2.3                | 4.65                                                                       | 11.0   | 91.5   | -0.59                         |

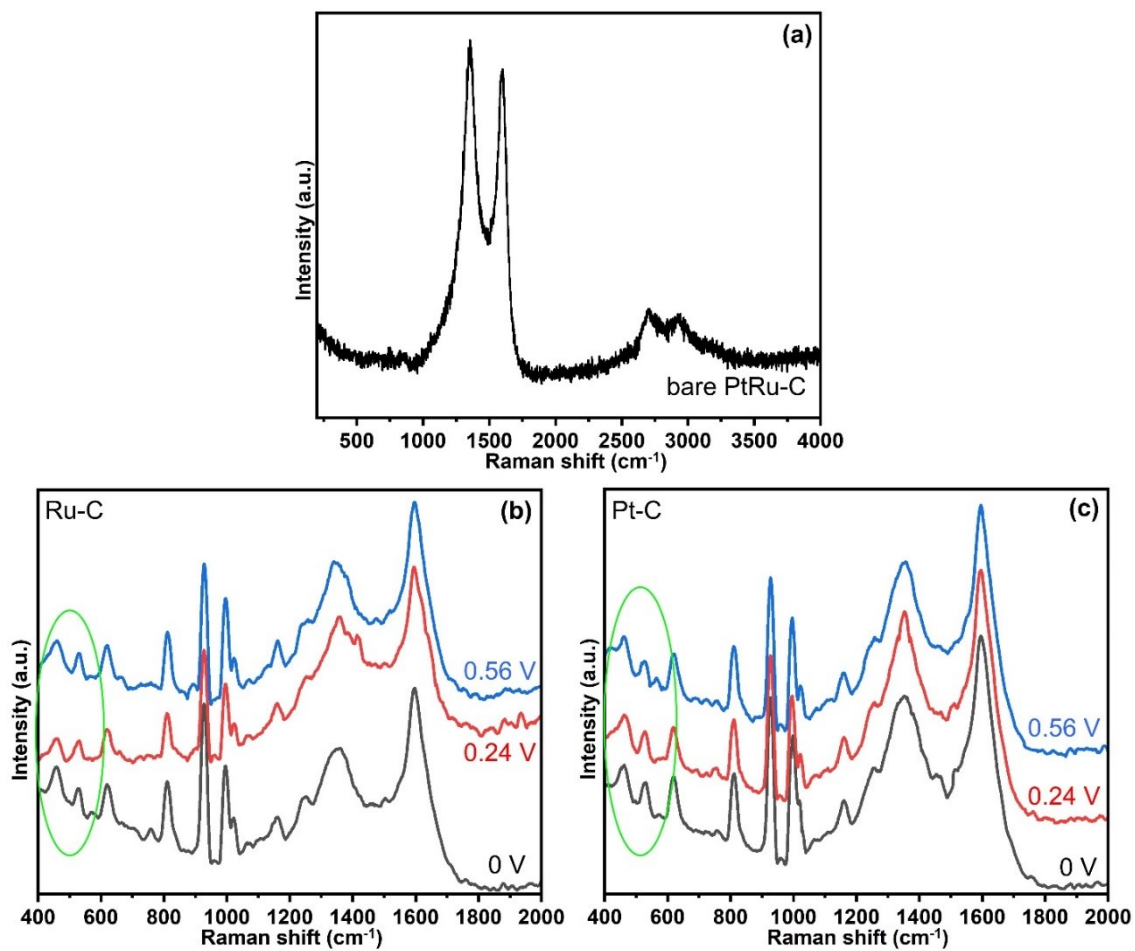

**Figure S9.** Raman spectra for: (a) bare labPtRu-C fresh catalyst; (b) EC-HDO on Ru-C catalyst at varying voltage; and (c) EC-HDO on Pt-C catalyst at varying voltage.



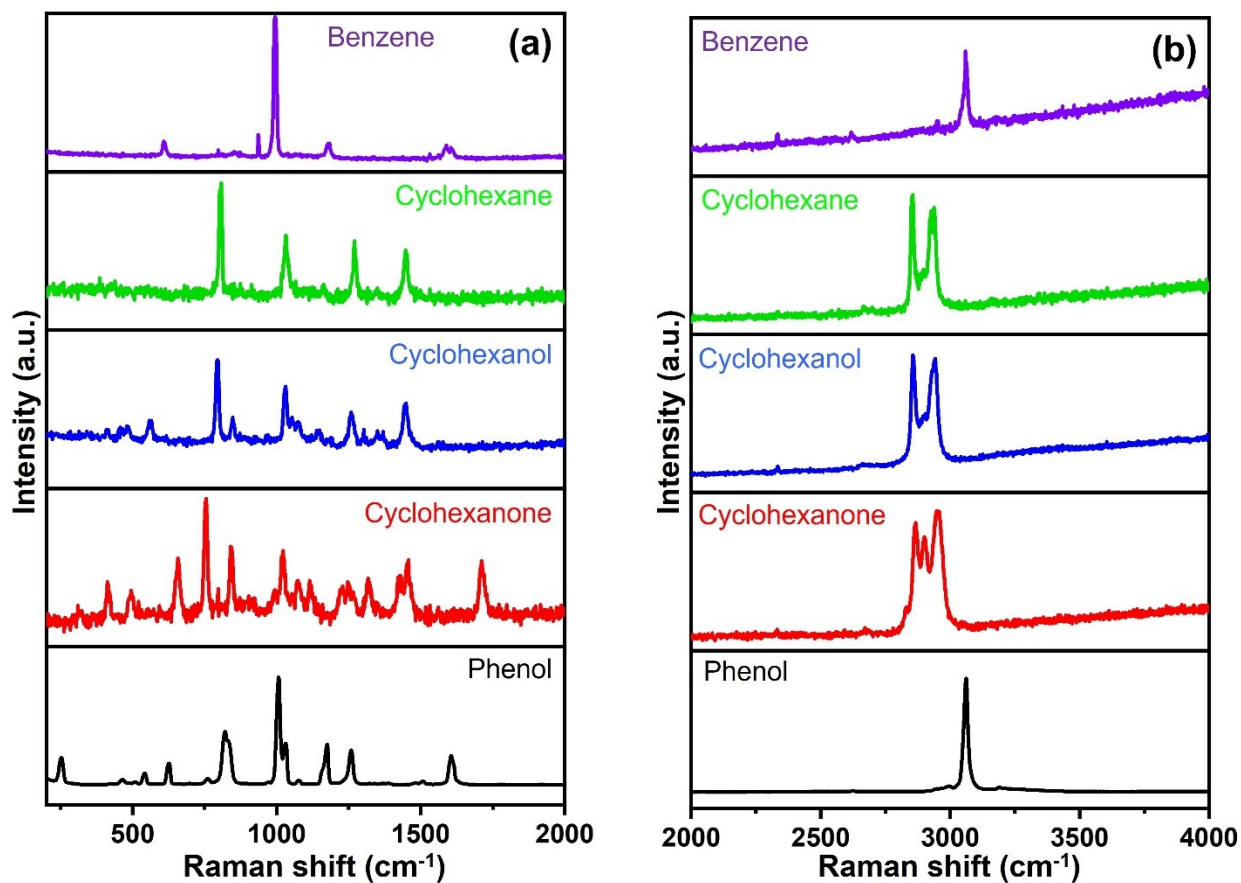

**Figure S10.** Raman spectra for reactants, intermediates and product compounds tested separately for (a) 200 – 2000  $\text{cm}^{-1}$ ; and (b) 2000 – 4000  $\text{cm}^{-1}$  Raman shifts.

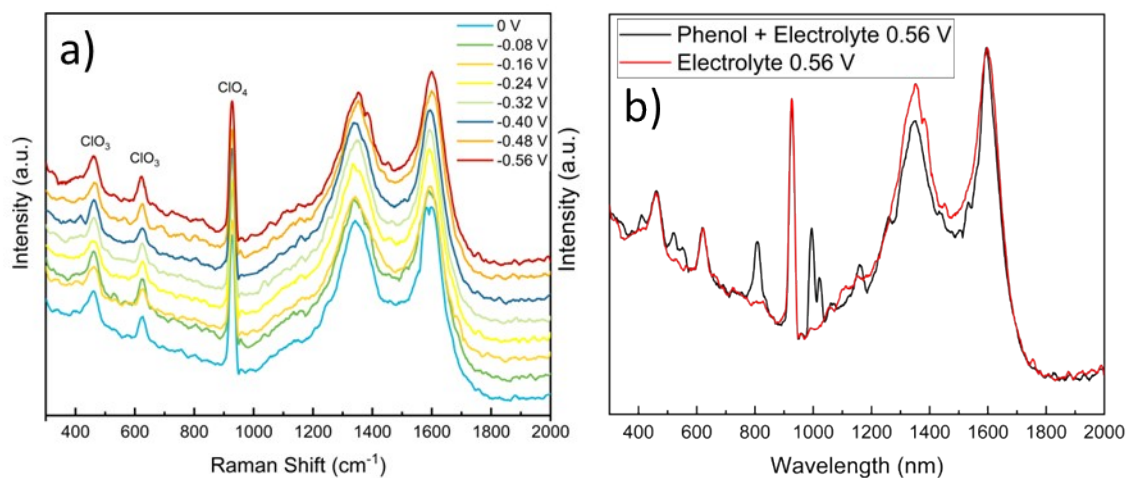

**Figure S11.** a) Operando Raman spectra for electrolysis in the absence of phenol using labPtRu-C catalyst at potentials from 0.0 V to -0.56 V vs Ag/AgCl. b) PtRu-C with phenol present and without at 0.56 V Ag/AgCl.

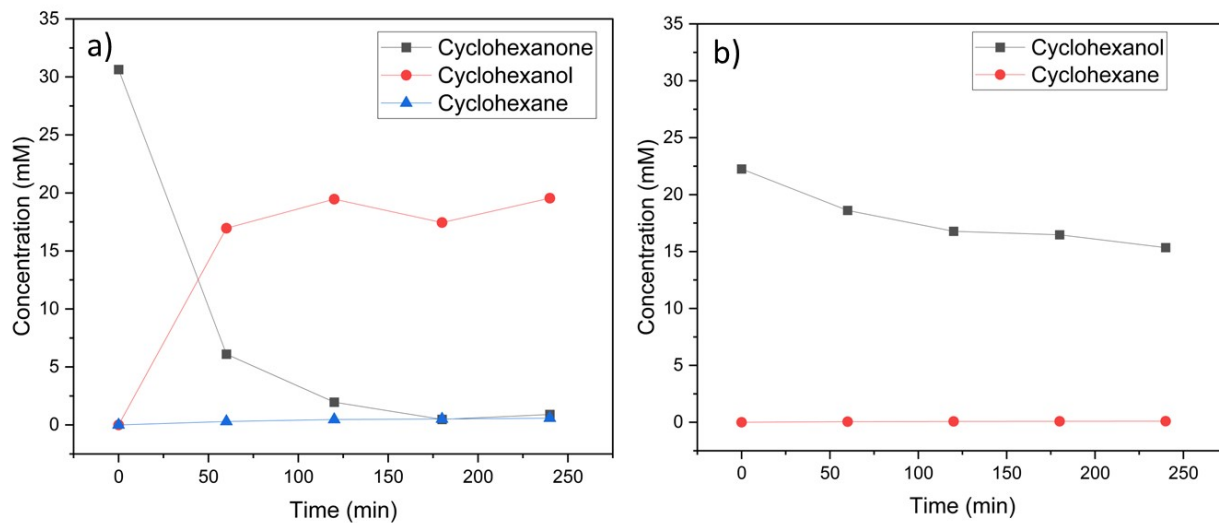

**Figure S12.** Concentration profile of EC-HDO of a) cyclohexanone and b) cyclohexanol. (Reaction conditions: constant potential  $-0.46$  V vs Ag/AgCl, labPtRu-C catalyst, 0.2 M perchloric acid,  $60$  °C, average current  $57$  mA cm<sup>2</sup>)
